# Supplementary material
Source: PubMed Central journal article supplement (PMC4214532)
Supplement: ASN.2013111205_ASN2013111205SupplementaryData.pdf [file ASN.2013111205_ASN2013111205SupplementaryData.pdf]

## Supplementary data

### **Length Polymorphism in *Heme Oxygenase-1* and Risk of Chronic Kidney Disease among Coronary Artery Disease Patients**

Yu-Hsin Chen,<sup>§\*</sup> Ko-Lin Kuo,<sup>\*\*</sup> Szu-Chun Hung,<sup>\*\*</sup> Chih-Cheng Hsu,<sup>ψ</sup> Ying-Hwa Chen,<sup>§†</sup> and Der-Cherng Tarng<sup>§!¶‡</sup>

<sup>§</sup>Faculty of Medicine, <sup>!</sup>Institute of Clinical Medicine and <sup>¶</sup>Department and Institute of Physiology, National Yang-Ming University, Taipei; <sup>\*</sup>Division of Nephrology, Department of Internal Medicine, Taipei City Hospital Yang-Ming Branch, Taipei; <sup>\*\*</sup>Division of Nephrology, Taipei Tzuchi Hospital, The Buddhist Tzuchi Medical Foundation, Taipei; <sup>ψ</sup>Division of Geriatrics and Gerontology, Institute of Population Health Sciences, National Health Research Institutes; Divisions of <sup>†</sup>Cardiology and <sup>‡</sup>Nephrology, Department of Medicine and Immunology Center, Taipei Veterans General Hospital, Taipei, Taiwan

**Supplementary Table 1. Adjusted hazard ratio (95% confidence interval) of total bilirubin, serum ferritin and malondialdehyde for renal endpoints<sup>a</sup> in CAD patients with a median follow-up of 10.2 years**

|                                                          | Adjusted Hazard Ratio (95% Confidence Interval) |                                      |                                      |
|----------------------------------------------------------|-------------------------------------------------|--------------------------------------|--------------------------------------|
|                                                          | Bilirubin                                       | Ferritin                             | Malondialdehyde                      |
|                                                          | For each 1 mg/dL increase                       | For each 100 µg/L increase           | For each 1 µmol/L increase           |
| <b>Cox regression model<sup>b</sup></b>                  | 0.91 (0.86–0.95)<br><i>P</i> = 0.022            | 1.20 (1.03–1.32)<br><i>P</i> = 0.012 | 1.23 (1.01–1.42)<br><i>P</i> = 0.010 |
| <b>Cox with time-varying covariate model<sup>c</sup></b> | 0.90 (0.85–0.99)<br><i>P</i> = 0.048            | 1.16 (0.99–1.35)<br><i>P</i> = 0.058 | 1.12 (0.90–1.45)<br><i>P</i> = 0.072 |

<sup>a</sup>Renal endpoints are serum creatinine doubling and/or end-stage renal disease necessitating long-term renal replacement therapy.

<sup>b</sup>A Cox regression model was adjusted for age, sex, smoking status, diabetes, hypertension, prior congestive heart failure, stroke or peripheral arterial disease, total cholesterol, high-density lipoprotein-cholesterol, serum albumin, hemoglobin, estimated glomerular filtration rate, the presence of proteinuria at baseline, and the use of renin-angiotensin system blockades or statins.

<sup>c</sup>The multivariate Cox regression model was further analyzed using the cardiac events as the time-dependent covariates.

<sup>d</sup>To avoid multicollinearity, the genotypes of length polymorphism in *HO-1* promoter were not offered in the Cox regression model and Cox with time-varying covariate model.
